# Supplementary material for: Experimental and theoretical study of multinuclear indium–oxo clusters in CHA zeolite for CH4 activation at room temperature
Source: Royal Society of Chemistry journal article supplement (doi:10.1039/c9cp01873e), 2019-01-01
Supplement: c9cp01873e1.pdf [file c9cp01873e1.pdf]

Electronic Supplementary Information

## Experimental and theoretical study of multinuclear indium-oxo clusters in CHA zeolite for CH<sub>4</sub> activation at room temperature

Zen Maeno<sup>\*a</sup>, Shunsaku Yasumura<sup>a</sup>, Chong Liu<sup>a</sup>, Takashi Toyao<sup>a,b</sup>, Kenichi Kon<sup>a</sup>,  
Akira Nakayama<sup>a,c</sup>, Jun-ya Hasegawa<sup>a</sup>, Ken-ichi Shimizu<sup>\*a,b</sup>

<sup>a</sup> Institute for Catalysis, Hokkaido University, N-21, W-10, Sapporo 001-0021, Japan

<sup>b</sup> Elements Strategy Initiative for Catalysts and Batteries, Kyoto University, Katsura,  
Kyoto 615-8520, Japan

<sup>c</sup>JST, PRESTO, 4-1-8 Honcho Kawaguchi, Saitama 332-0012, Japan

\*Corresponding authors

Zen Maeno, Ken-ichi Shimizu

E-mail: kshimizu@cat.hokudai.ac.jp, TEL: +81-11-706-9164

## Figures and Tables

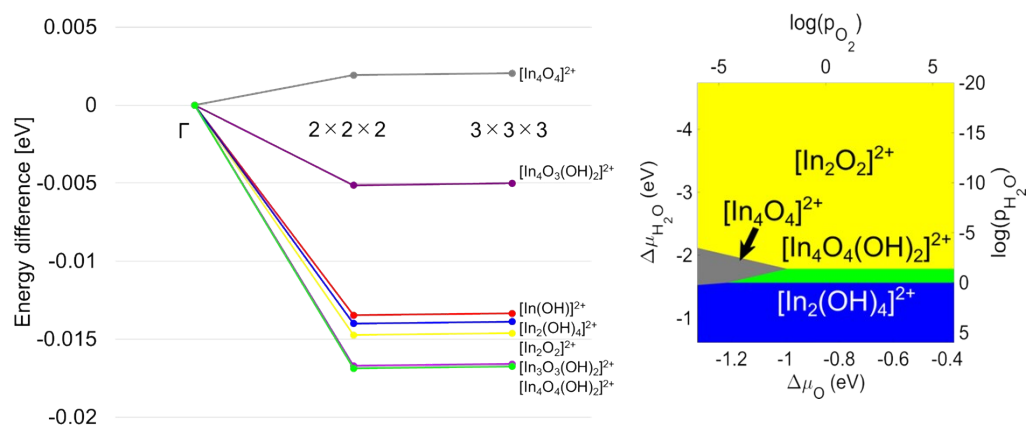

**Figure S1.** Difference of total energy using  $2 \times 2 \times 2$  and  $3 \times 3 \times 3$  k point meshes and that using  $\Gamma$  point for each In-oxo ions on 8MR(4NN) (left). The phase diagram for 8MR(4NN) obtained using  $2 \times 2 \times 2$  k point mesh (right).

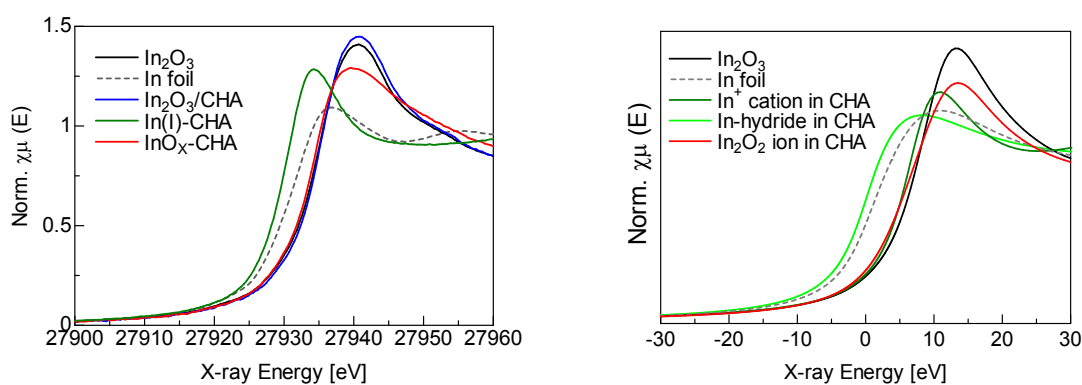

**Figure S2.** Comparison of experimental (left) and simulated (right) XANES spectra of a series of In-CHA and reference In compounds (In foil and  $\text{In}_2\text{O}_3$ ).

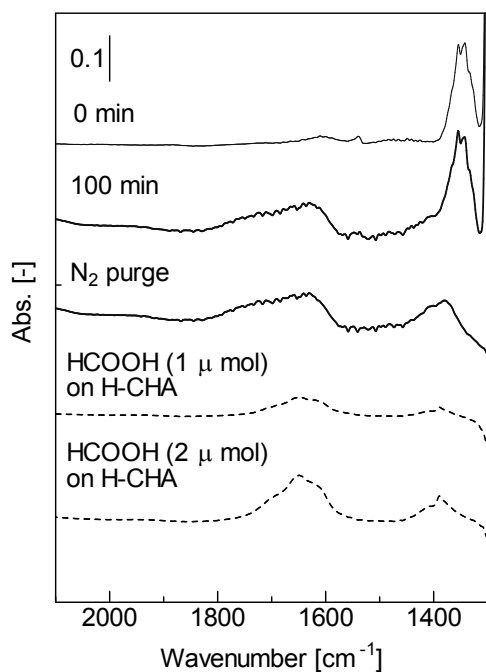

**Figure S3.** FT-IR spectra during reaction of CH<sub>4</sub> on InO<sub>x</sub>-CHA at room temperature and formic acid on H-CHA (as reference).

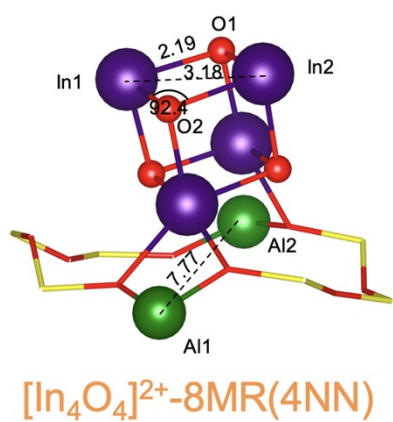

**Figure S4.** Optimized structure of  $[\text{In}_4\text{O}_4]^{2+}\text{-8MR } 4\text{NN}$

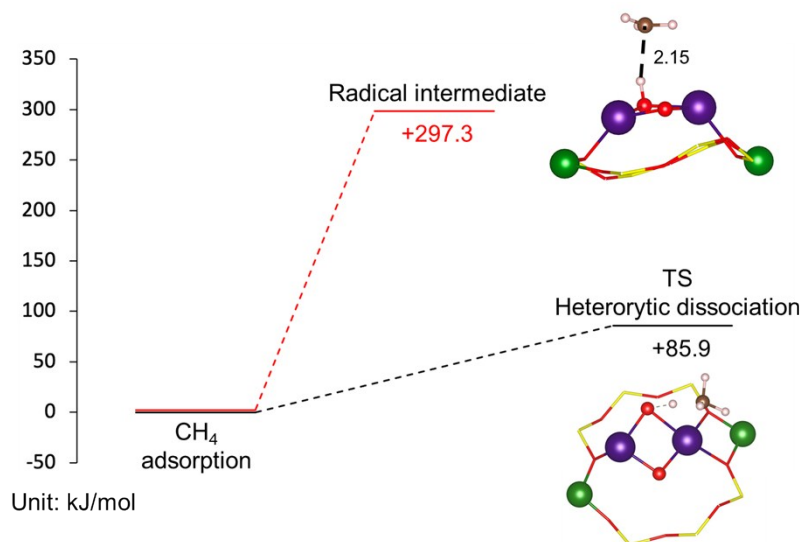

**Figure S5.** Comparison of energy diagrams in C–H cleavage of CH<sub>4</sub> on [In<sub>2</sub>O<sub>2</sub>]<sup>2+</sup>-8MR 4NN through heterolytic path (lower) and homolytic path (upper).

**Table S1.** Specific surface areas and pore volumes of zeolites

| Sample                              | BET surface area (m <sup>2</sup> g <sup>-1</sup> ) | Pore volume (mL g <sup>-1</sup> ) |
|-------------------------------------|----------------------------------------------------|-----------------------------------|
| H-CHA                               | 833                                                | 0.402                             |
| In <sub>2</sub> O <sub>3</sub> /CHA | 785                                                | 0.378                             |
| InO <sub>x</sub> -CHA               | 710                                                | 0.344                             |

**Table S2.** Total energy (eV) of In-oxo ions on 6MR(3NN), 8MR(3NN), and 8MR(4NN)

| In species                                                        | 6MR(3NN) | 8MR(3NN) | 8MR(4NN) |
|-------------------------------------------------------------------|----------|----------|----------|
| [In(OH)] <sup>2+</sup>                                            | -873.3   | -871.9   | -871.8   |
| [In <sub>2</sub> O <sub>2</sub> ] <sup>2+</sup>                   | -876.5   | -877.0   | -877.2   |
| [In <sub>2</sub> (OH) <sub>4</sub> ] <sup>2+</sup>                | -909.2   | -909.4   | -909.0   |
| [In <sub>3</sub> O <sub>3</sub> (OH) <sub>2</sub> ] <sup>2+</sup> | -897.0   | -898.3   | -898.0   |
| [In <sub>4</sub> O <sub>4</sub> ] <sup>2+</sup>                   | -897.4   | -897.9   | -898.1   |
| [In <sub>4</sub> O <sub>3</sub> (OH) <sub>2</sub> ] <sup>2+</sup> | -913.2   | -913.9   | -913.5   |
| [In <sub>4</sub> O <sub>4</sub> (OH) <sub>2</sub> ] <sup>2+</sup> | -919.3   | -920.2   | -920.0   |
